# Supplementary material for: Plasma Proteomic Analysis Identified Proteins Associated with Faulty Neutrophils Functionality in Decompensated Cirrhosis Patients with Sepsis
Source: MDPI journal article supplement (doi:10.3390/cells11111745), 2022-05-25

# **Plasma proteomic analysis identified proteins associated with faulty neutrophils functionality in decompensated cirrhosis patients with sepsis**

Rashi Sehgal<sup>1,2</sup>, Navkiran Kaur<sup>2</sup>, Rakhi Maiwall<sup>3</sup>, Gayatri Ramakrishna<sup>1</sup>, Jaswinder Singh Maras<sup>1\*</sup>, Nirupma Trehanpati<sup>1\*</sup>

## *SUPPLEMENTARY INFORMATION*

### **Corresponding Authors:**

\*Corresponding Authors:

Dr. Nirupma Trehanpati

Professor, Department of Molecular and Cellular Medicine

Institute of Liver and Biliary Sciences

D-1 Vasant Kunj, New Delhi 110070, India

[trehanpati@ilbs.in](mailto:trehanpati@ilbs.in), [trehanpati@gmail.com](mailto:trehanpati@gmail.com)

ORCID: 0000-0002-6109-0033

Dr. Jaswinder Singh Maras

Assistant Professor, Department of Molecular and Cellular Medicine

Institute of Liver and Biliary Sciences

D-1 Vasant Kunj, New Delhi 110070, India

[jassi2param@gmail.com](mailto:jassi2param@gmail.com)

## SUPPLEMENTARY TABLE:

**Supplementary Table S1:** Lowest detection limit of cytokines, chemokines, and growth factors in cytokine bead array assay.

| S. No. | Name           | Lowest detection limit (pg/ml) |
|--------|----------------|--------------------------------|
| 1      | IL-6           | 10                             |
| 2      | IL-2           | 5.71                           |
| 3      | IL-4           | 9.99                           |
| 4      | IL-10          | 1.70                           |
| 5      | TNF- $\alpha$  | 8.59                           |
| 6      | IFN- $\gamma$  | 15                             |
| 7      | GMCSF          | 15                             |
| 8      | MIF            | 0.21                           |
| 9      | IL-8           | 2.76                           |
| 10     | MCP-1          | 3.93                           |
| 11     | IP-10          | 2.03                           |
| 12     | GCSF           | 13                             |
| 13     | IL-1 $\beta$   | 1.99                           |
| 14     | IL-18          | 17                             |
| 15     | TGF-b1         | 3                              |
| 16     | MIP-1A         | 2.04                           |
| 17     | MIP-1B         | 5.64                           |
| 18     | MIP-3A         | 4.44                           |
| 19     | ITAC           | 3.74                           |
| 20     | FRACTALKINE    | 1.25                           |
| 21     | ENA78          | 6.59                           |
| 22     | MCSF           | 14                             |
| 23     | LEPTIN         | 16                             |
| 24     | VEGF-A         | 5.37                           |
| 25     | MMP12          | 5.76                           |
| 26     | E SELECTIN     | 206                            |
| 27     | Angiopoietin-1 | 32                             |
| 28     | Eotaxin        | 0.62                           |
| 29     | HGF            | 6.49                           |
| 30     | IL-1RA         | 43                             |
| 31     | IL-12p40       | 1.35                           |
| 32     | IL-17A         | 2.27                           |
| 33     | IL-27          | 17                             |
| 34     | IL-33          | 23                             |
| 35     | MMP-1          | 8.52                           |
| 36     | MMP-13         | 7.96                           |
| 37     | MMP-7          | 11                             |
| 38     | MMP-8          | 36                             |
| 39     | P-SELECTIN     | 1348                           |
| 40     | TPO            | 94                             |
| 41     | TREM-1         | 689                            |

**Supplementary Table S2:** Correlation of upregulated and downregulated proteins with the neutrophils, its oxidative burst activity, MELD, MELD Na and Bilirubin. R-value and p-value given in each cell. Cell containing no value shows no significant correlation.

|                           | DNAJC13          | GPI              | GASTP1         | PNP            | ANPEP          | COTL1            | PGMA1          | APOA1           | PROS1          | SERPINA3       | MPO            | MMRN1          |
|---------------------------|------------------|------------------|----------------|----------------|----------------|------------------|----------------|-----------------|----------------|----------------|----------------|----------------|
| NEUTROPHILS               | 0.945<br>0.002   | 0.994<br><0.0001 | 0.879<br>0.021 | 0.885<br>0.019 | 0.915<br>0.010 | 0.977<br><0.0001 | 0.905<br>0.013 | -0.896<br>0.015 | 0.970<br>0.001 | 0.927<br>0.007 | 0.903<br>0.013 | 0.882<br>0.020 |
| CD11b <sup>+</sup> NEUTRO | 0.835<br>0.038   | -                | -              | -              | 0.840<br>0.036 | 0.869<br>0.024   | 0.856<br>0.039 | -               | 0.933<br>0.006 | 0.864<br>0.026 | 0.879<br>0.020 | -              |
| OXIDATIVE BURST           | 0.746<br>0.050   | -                | -              | -              | -              | 0.824<br>0.043   | 0.899<br>0.014 | -               | 0.944<br>0.004 | 0.884<br>0.019 | -              | -              |
| MELD                      | 0.916<br>0.010   | 0.967<br>0.001   | 0.816<br>0.047 | 0.794<br>0.050 | 0.920<br>0.001 | 0.906<br>0.012   | 0.809<br>0.050 | -0.836<br>0.037 | 0.906<br>0.013 | 0.828<br>0.041 | 0.957<br>0.002 | -              |
| MELD Na                   | 0.953<br>0.003   | 0.980<br><0.0001 | 0.881<br>0.020 | 0.870<br>0.024 | 0.934<br>0.006 | 0.958<br>0.002   | 0.855<br>0.029 | -0.881<br>0.020 | 0.936<br>0.006 | 0.880<br>0.020 | 0.938<br>0.005 | 0.838<br>0.037 |
| Bilirubin                 | 0.976<br><0.0001 | 0.972<br>0.001   | 0.933<br>0.006 | 0.908<br>0.012 | 0.966<br>0.001 | 0.987<br><0.0001 | 0.834<br>0.039 | -0.863<br>0.026 | 0.921<br>0.009 | 0.895<br>0.015 | 0.915<br>0.010 | 0.868<br>0.002 |

**Supplementary Table S3:** Correlation of neutrophils, its phagocytic and oxidative burst activity with the cytokines, chemokine and growth factors. R-value and p-value given in each cell. Cell containing no value shows no significant correlation.

|                                       | IL-10          | TPO             | MIP-1α          | IL-33           | MCSF           | MCP1           | HGF            | ENA78          | MIP3α          | MMP1           | PSELECTIN      | TREM1          | IL-18            | IL-4           | IFN-γ            | TNF-α          | MMP7            | VEGF-A         | IL-12p40       | IL-1β          | TGF-β1         | MIP-1β          | ESELECTIN       | MIF             | IL-27           | EOTAXIN         | IL-17A          | IL-2            | IP-10          |
|---------------------------------------|----------------|-----------------|-----------------|-----------------|----------------|----------------|----------------|----------------|----------------|----------------|----------------|----------------|------------------|----------------|------------------|----------------|-----------------|----------------|----------------|----------------|----------------|-----------------|-----------------|-----------------|-----------------|-----------------|-----------------|-----------------|----------------|
| NEUTROPHILS                           | -              | -               | -               | 0.746<br>0.027  | -              | 0.800<br>0.050 | 0.867<br>0.025 | 0.808<br>0.050 | 0.902<br>0.014 | 0.875<br>0.022 | 0.878<br>0.021 | 0.957<br>0.003 | 0.980<br><0.0001 | 0.958<br>0.002 | 0.992<br><0.0001 | 0.966<br>0.002 | 0.959<br>0.002  | 0.972<br>0.001 | 0.967<br>0.001 | 0.915<br>0.010 | 0.956<br>0.003 | 0.834<br>0.039  | -               | 0.891<br>0.017  | 0.932<br>0.006  | 0.936<br>0.005  | 0.939<br>0.005  | 0.969<br>0.001  | 0.973<br>0.001 |
| CD11b <sup>+</sup> NEUTRO             | -              | -               | -               | 0.863<br>0.027  | -              | -              | -              | -              | -              | -              | -              | 0.880<br>0.020 | 0.963<br>0.015   | 0.855<br>0.029 | 0.914<br>0.011   | 0.851<br>0.032 | 0.873<br>0.023  | 0.859<br>0.028 | 0.851<br>0.031 | 0.833<br>0.039 | 0.958<br>0.026 | 0.857<br>0.029  | -               | 0.844<br>0.034  | 0.947<br>0.004  | 0.939<br>0.005  | 0.879<br>0.021  | 0.932<br>0.006  | 0.960<br>0.002 |
| CD11b <sup>+</sup> CXCR1 <sup>+</sup> | 0.865<br>0.026 | -               | -               | -               | 0.862<br>0.027 | -              | -              | -              | -              | -              | -              | -              | -                | -              | -                | -              | -               | -              | -              | -              | -              | -               | -               | -               | -               | -               | -               | -               | -              |
| PHAGOCYTIC<br>ACTIVITY                | -              | -0.915<br>0.010 | -0.913<br>0.010 | -0.862<br>0.027 | -              | -              | -              | -              | -              | -              | -              | -              | -                | -              | -                | -              | -0.816<br>0.047 | -              | -              | -              | -              | -0.813<br>0.048 | -0.832<br>0.039 | -0.831<br>0.040 | -0.877<br>0.022 | -0.873<br>0.023 | -0.874<br>0.023 | -0.823<br>0.044 | -              |
| OXIDATIVE BURST                       | -              | -               | -               | -               | -              | -              | -              | -              | -              | -              | -              | -              | 0.903<br>0.042   | 0.849<br>0.032 | 0.883<br>0.019   | 0.821<br>0.045 | 0.811<br>0.050  | 0.796<br>0.050 | -              | 0.863<br>0.027 | 0.977<br>0.000 | -               | -               | 0.934<br>0.006  | 0.893<br>0.016  | 0.868<br>0.025  | 0.924<br>0.008  | 0.959<br>0.002  |                |

**Supplementary Table S4:** Correlation of upregulated and downregulated proteins with the cytokines, chemokine and growth factors. R-value and p-value given in each cell. Cell containing no value shows no significant correlation.

|          | MIP-1α         | ANGIOPOIENTIN  | MCSF           | IL-8            | MMP8           | MCP1            | HGF             | ENA78           | MIP3α           | MMP1            | PSSELECTIN      | TREM1           | IL-18           | IL-4            | IFN-γ           | TNF-α           | MMP7            | VEGF-A          | IL-12p40        | IL-1β           | TGF-β1          | MIP-1β         | ESELECTIN       | MIF             | IL-27           | EOTAXIN         | IL-17A          | IL-2            | IP-10           |                |
|----------|----------------|----------------|----------------|-----------------|----------------|-----------------|-----------------|-----------------|-----------------|-----------------|-----------------|-----------------|-----------------|-----------------|-----------------|-----------------|-----------------|-----------------|-----------------|-----------------|-----------------|----------------|-----------------|-----------------|-----------------|-----------------|-----------------|-----------------|-----------------|----------------|
| DNAIC13  | -              | -              | -              | 0.837<br>0.037  | -              | 0.943<br>0.005  | 0.973<br>0.001  | 0.899<br>0.014  | 0.968<br>0.001  | 0.934<br>0.006  | 0.961<br>0.002  | 0.945<br>0.004  | 0.926<br>0.008  | 0.906<br>0.013  | 0.944<br>0.004  | 0.947<br>0.004  | 0.981<br>0.0001 | 0.985<br>0.0001 | 0.986<br>0.0001 | 0.807<br>0.050  | 0.823<br>0.044  | 0.858<br>0.028 | 0.871<br>0.023  | 0.947<br>0.004  | 0.854<br>0.030  | 0.900<br>0.014  | 0.899<br>0.015  | 0.900<br>0.014  | 0.874<br>0.022  |                |
| GPI      | -              | -              | -              | -               | -              | -               | 0.835<br>0.038  | -               | 0.874<br>0.023  | 0.848<br>0.033  | 0.834<br>0.038  | 0.960<br>0.002  | 0.987<br>0.0001 | 0.943<br>0.005  | 0.984<br>0.001  | 0.985<br>0.001  | 0.923<br>0.008  | 0.950<br>0.003  | 0.939<br>0.005  | 0.916<br>0.010  | 0.959<br>0.002  | 0.804<br>0.050 | -               | 0.850<br>0.032  | 0.912<br>0.011  | 0.910<br>0.013  | 0.905<br>0.013  | 0.950<br>0.004  | 0.965<br>0.002  |                |
| GSTP1    | -              | -              | 0.839<br>0.036 | 0.924<br>0.008  | 0.885<br>0.019 | 0.983<br>0.004  | 0.983<br>0.0001 | 0.959<br>0.002  | 0.985<br>0.0001 | 0.966<br>0.001  | 0.992<br>0.0001 | 0.895<br>0.016  | 0.839<br>0.036  | 0.885<br>0.019  | 0.889<br>0.014  | 0.931<br>0.007  | 0.947<br>0.004  | 0.964<br>0.002  | 0.964<br>0.002  | 0.968<br>0.001  | -               | -              | -               | 0.802<br>0.050  | 0.893<br>0.016  | -               | 0.813<br>0.049  | 0.857<br>0.029  | 0.838<br>0.037  | -              |
| PNP      | -              | 0.824<br>0.043 | -              | 0.906<br>0.013  | 0.860<br>0.028 | 0.884<br>0.019  | 0.925<br>0.008  | 0.985<br>0.0001 | 0.965<br>0.002  | 0.957<br>0.002  | 0.994<br>0.000  | 0.849<br>0.032  | 0.809<br>0.050  | 0.932<br>0.007  | 0.913<br>0.010  | 0.959<br>0.002  | 0.953<br>0.003  | 0.956<br>0.003  | 0.971<br>0.001  | 0.845<br>0.034  | -               | -              | -               | 0.863<br>0.026  | 0.806<br>0.050  | 0.916<br>0.042  | 0.888<br>0.010  | 0.842<br>0.018  | 0.842<br>0.035  |                |
| ANPEP    | -              | -              | 0.937<br>0.005 | -               | -              | 0.886<br>0.018  | 0.952<br>0.003  | -               | 0.917<br>0.009  | 0.875<br>0.022  | 0.861<br>0.027  | 0.978<br>0.0001 | 0.819<br>0.003  | 0.819<br>0.046  | 0.901<br>0.014  | 0.866<br>0.025  | 0.895<br>0.015  | 0.937<br>0.006  | 0.856<br>0.006  | 0.918<br>0.009  | -               | -              | 0.835<br>0.038  | 0.824<br>0.043  | 0.890<br>0.017  | -               | 0.830<br>0.040  | -               | 0.805<br>0.050  | 0.803<br>0.050 |
| COTL1    | -              | -              | -              | -               | -              | 0.821<br>0.045  | 0.921<br>0.009  | 0.899<br>0.015  | 0.967<br>0.001  | 0.956<br>0.003  | 0.945<br>0.004  | 0.963<br>0.002  | 0.942<br>0.005  | 0.978<br>0.0001 | 0.993<br>0.001  | 0.992<br>0.0001 | 0.954<br>0.003  | 0.994<br>0.0001 | 0.994<br>0.0001 | 0.990<br>0.007  | 0.930<br>0.013  | -              | -               | 0.856<br>0.029  | 0.858<br>0.028  | 0.918<br>0.009  | 0.935<br>0.006  | 0.925<br>0.008  | 0.925<br>0.008  |                |
| GCA      | -              | -              | 0.797<br>0.050 | 0.977<br>0.0001 | 0.938<br>0.005 | 0.946<br>0.004  | 0.954<br>0.003  | 0.960<br>0.002  | 0.945<br>0.004  | 0.926<br>0.008  | 0.975<br>0.0001 | 0.799<br>0.050  | 0.808<br>0.050  | 0.810<br>0.050  | 0.864<br>0.026  | 0.901<br>0.014  | 0.900<br>0.014  | 0.900<br>0.014  | 0.913<br>0.010  | -               | -               | -              | 0.861<br>0.028  | -               | -               | 0.803<br>0.050  | -               | -               | -               |                |
| PGAM1    | -              | -              | -              | -               | -              | -               | -               | -               | -               | -               | -               | -               | 0.819<br>0.045  | 0.960<br>0.002  | 0.923<br>0.008  | 0.926<br>0.008  | 0.849<br>0.032  | 0.856<br>0.029  | 0.866<br>0.026  | 0.979<br>0.000  | 0.967<br>0.001  | -              | -               | 0.889<br>0.017  | 0.829<br>0.041  | 0.937<br>0.006  | 0.952<br>0.003  | 0.955<br>0.003  |                 |                |
| APOA1    | -              | -              | -              | -               | -              | -0.831<br>0.040 | -0.814<br>0.048 | -0.903<br>0.013 | -0.863<br>0.026 | -0.841<br>0.036 | -0.917<br>0.009 | -               | -0.807<br>0.050 | -0.924<br>0.008 | -0.900<br>0.014 | -0.934<br>0.006 | -0.963<br>0.002 | -0.911<br>0.011 | -0.937<br>0.006 | -0.849<br>0.032 | -0.872<br>0.023 | -              | -0.813<br>0.049 | -0.891<br>0.017 | -0.921<br>0.009 | -0.917<br>0.009 | -0.985<br>0.000 | -0.955<br>0.003 | -0.917<br>0.009 |                |
| AHSG     | -              | 0.875<br>0.022 | -              | -               | -              | -               | -               | 0.841<br>0.035  | -               | -               | 0.799<br>0.050  | -               | 0.898<br>0.015  | 0.810<br>0.050  | 0.868<br>0.025  | -               | -               | -               | 0.805<br>0.050  | 0.896<br>0.015  | 0.831<br>0.040  | -              | -               | -               | -               | 0.903<br>0.013  | 0.870<br>0.024  | 0.839<br>0.036  | 0.839<br>0.036  |                |
| PROS1    | -              | -              | -              | -               | -              | -               | -               | -               | 0.837<br>0.037  | 0.829<br>0.041  | 0.819<br>0.046  | 0.891<br>0.017  | 0.924<br>0.008  | 0.974<br>0.001  | 0.975<br>0.000  | 0.954<br>0.003  | 0.897<br>0.015  | 0.919<br>0.009  | 0.918<br>0.009  | 0.975<br>0.009  | 0.989<br>0.0001 | -              | -               | -               | 0.916<br>0.010  | 0.882<br>0.019  | 0.936<br>0.005  | 0.970<br>0.001  | 0.982<br>0.0001 |                |
| SERPINA3 | -              | 0.841<br>0.036 | -              | -               | -              | -               | -               | -               | 0.835<br>0.038  | 0.848<br>0.032  | 0.798<br>0.050  | 0.883<br>0.019  | 0.881<br>0.020  | 0.963<br>0.002  | 0.954<br>0.003  | 0.937<br>0.005  | 0.824<br>0.043  | 0.893<br>0.016  | 0.882<br>0.019  | 0.990<br>0.000  | 0.942<br>0.005  | -              | -               | -               | 0.812<br>0.049  | -               | 0.860<br>0.027  | 0.903<br>0.014  | 0.920<br>0.009  |                |
| MPO      | 0.815<br>0.482 | -              | 0.831<br>0.040 | -               | -              | 0.927<br>0.007  | 0.888<br>0.018  | -               | 0.832<br>0.039  | -               | 0.817<br>0.047  | 0.893<br>0.016  | 0.929<br>0.007  | -               | 0.859<br>0.028  | 0.823<br>0.044  | 0.933<br>0.006  | 0.894<br>0.016  | 0.892<br>0.017  | -               | -               | 0.971<br>0.001 | 0.963<br>0.002  | 0.981<br>0.0001 | 0.875<br>0.022  | 0.938<br>0.005  | 0.835<br>0.038  | 0.852<br>0.031  | 0.842<br>0.035  |                |
| MMRN1    | -              | 0.926<br>0.007 | -              | -               | -              | -               | -               | 0.943<br>0.004  | 0.905<br>0.013  | 0.921<br>0.008  | 0.930<br>0.007  | -               | -               | 0.976<br>0.000  | 0.925<br>0.008  | 0.969<br>0.001  | 0.893<br>0.016  | 0.918<br>0.009  | 0.931<br>0.007  | 0.949<br>0.004  | 0.864<br>0.026  | -              | -               | -               | 0.807<br>0.050  | -               | 0.926<br>0.011  | 0.910<br>0.020  | 0.881<br>0.020  |                |

**Supplementary Table S5:** Sequence of primers used for RT-PCR

| <b>Name</b>                     | <b>Forward primer</b>   | <b>Reverse primer</b>   |
|---------------------------------|-------------------------|-------------------------|
| <b>18s</b>                      | AAGTACGCACGGCCGGTACA    | AGCGCCCGTCGGCATGTATTA   |
| <b>DNAJC13</b>                  | AGTGGCAAAGACTAGCTGGAA   | TGTCCTCTTTTGGAGCAATGCC  |
| <b>TMSB4X</b>                   | ACTGCCTTCCAAAGAAACGAT   | AGGGGCAGCACAGTCATTTA    |
| <b>AHSG</b>                     | CATGGCCCAGGGCTGATTTA    | CTGCTGAGGCCACACCTTTA    |
| <b>HMGB1</b>                    | ATA TGGCAAAAGCGGACAAG   | AGGCCAGGATGTT CTCCTTT   |
| <b>HIF-1<math>\alpha</math></b> | GTTTACTAAAGGACAAGTCACC  | TTCTGTTTGTTGAAGGGAG     |
| <b>ATG5</b>                     | TTGACGTTGGTAACTGACAAAGT | TGTGATGTTCCAAGGAAGAGC   |
| <b>ATG12</b>                    | TAGAGCGAACACGAACCATCC   | CACTGCCAAAACCATCATAGAGA |

## SUPPLEMENTARY FIGURES:

**SUPPLEMENTARY FIGURE S1:** Scatter dot plot shows the percent expression of Neutrophils, CD11b<sup>+</sup>CD66b<sup>+</sup> cells, CXCR1<sup>+</sup> and CXCR2<sup>+</sup> on CD11b<sup>+</sup>CD66b<sup>+</sup> neutrophils in sepsis and w/o sepsis at different time points i.e D0, D3 and D7.

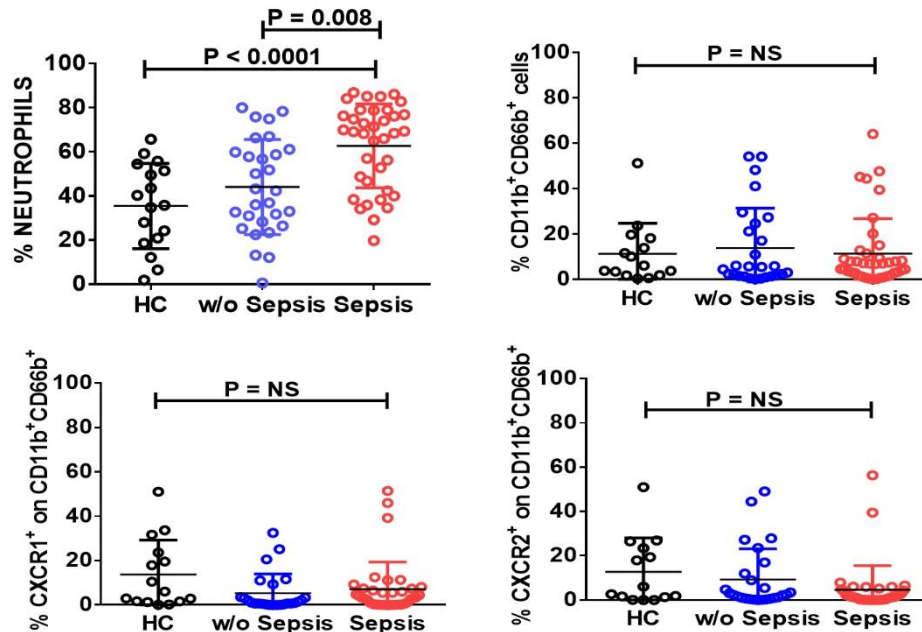

**SUPPLEMENTARY FIGURE S2:** Scatter dot plot shows the percent expression of Neutrophils, CD11b<sup>+</sup>CD66b<sup>+</sup> cells, CXCR1<sup>+</sup> and CXCR2<sup>+</sup> on CD11b<sup>+</sup>CD66b<sup>+</sup> neutrophils **A)** based on alcohol (ALC) and other etiologies (NASH and cryptogenic) in patients with or w/o sepsis; **B)** with or w/o AKI as a decompensating event in sepsis patients.

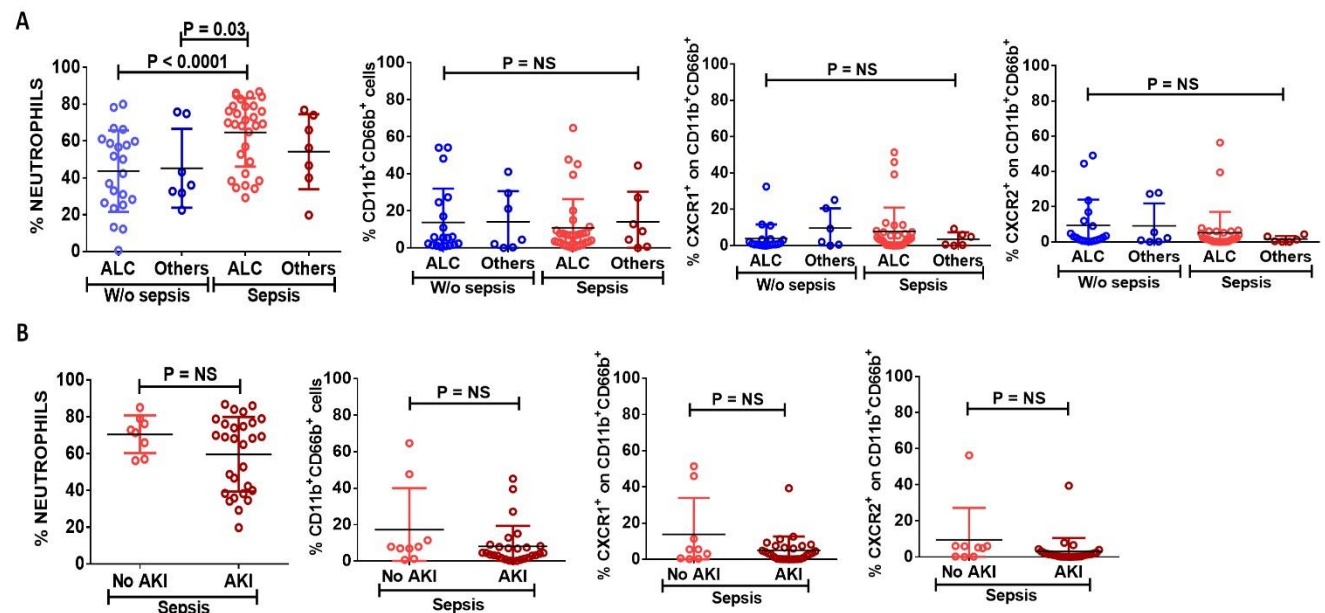

**SUPPLEMENTARY FIGURE S3:** Scatter dot plot shows the percent expression of Neutrophils, CD11b<sup>+</sup>CD66b<sup>+</sup> cells, CXCR1<sup>+</sup> and CXCR2<sup>+</sup> on CD11b<sup>+</sup>CD66b<sup>+</sup> neutrophils based on no resolution and resolution of sepsis upon similar treatment in decompensated cirrhosis with sepsis patients at D0, D3 and D7.

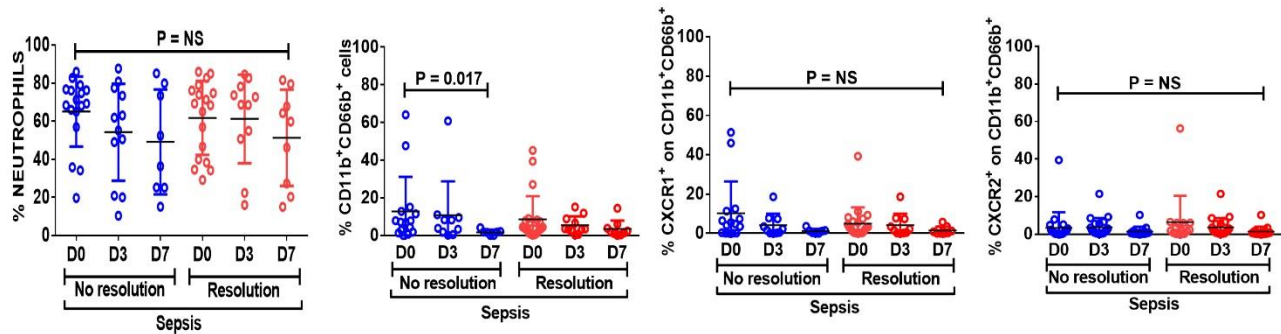

**SUPPLEMENTARY FIGURE S4:** Scatter dot plot shows the percent expression of phagocytic activity and oxidative burst activity (*E. coli*) of neutrophils in sepsis and w/o sepsis at D0, D3 and D7.

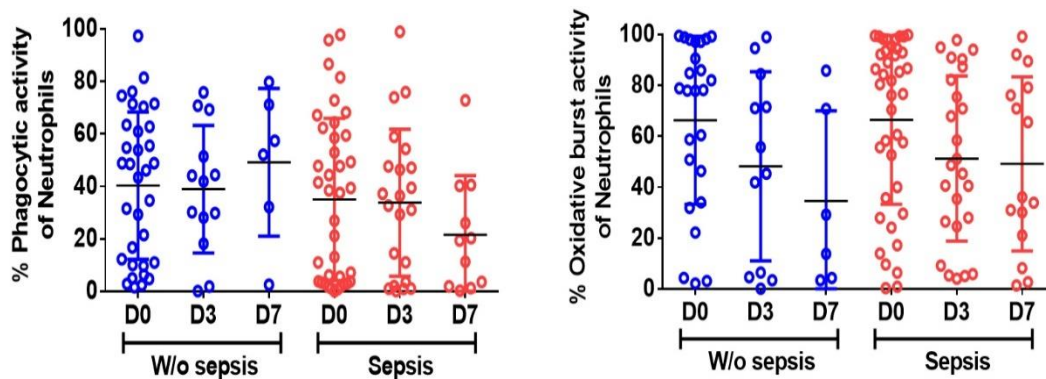



**SUPPLEMENTARY FIGURE S5:** Cell free DNA in sepsis and w/o sepsis at different time points i.e D0, D3 and D7.

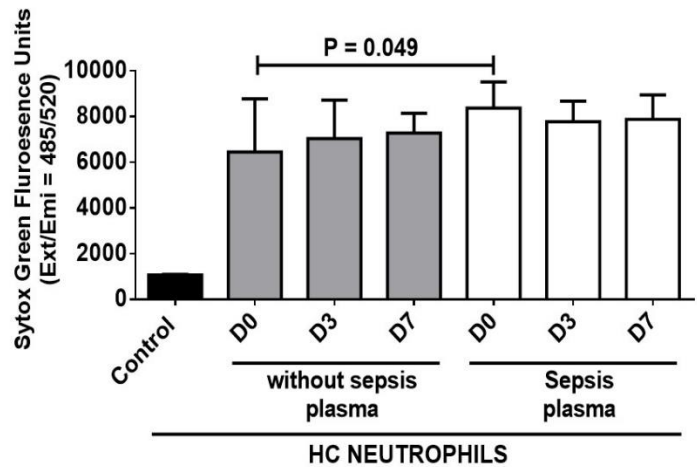

**SUPPLEMENTARY FIGURE S6:** Percent expression of **A)** HLA-DR on monocytes **B)** classical, intermediate, and non-classical monocytes **C)** HLA-DR on classical, intermediate, and non-classical monocytes, **D)** phagocytic and **E)** oxidative burst activity (E. coli) of monocytes in sepsis and w/o sepsis at different time points i.e D0, D3 and D7.

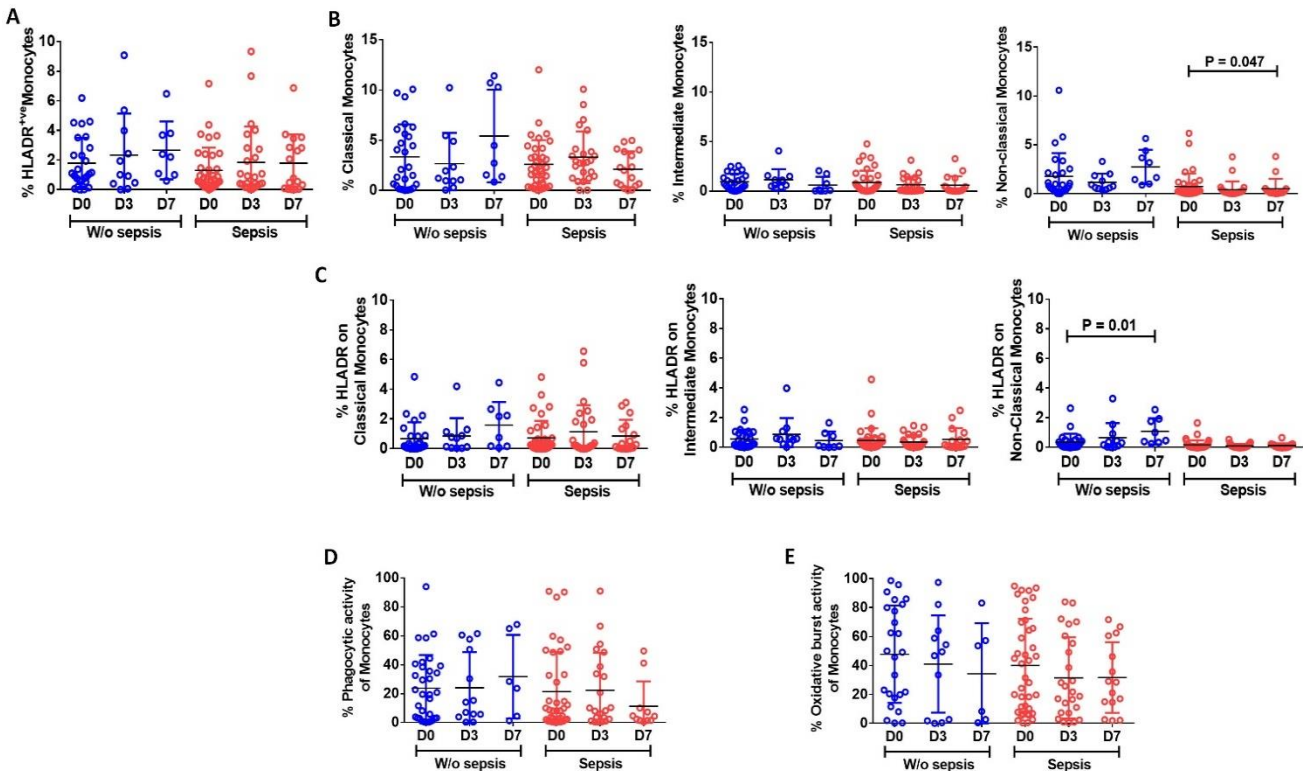

**SUPPLEMENTARY FIGURE S7:** Percent expression of **A)** HLA-DR on monocytes **B)** classical, intermediate, and non-classical monocytes based on no resolution and resolution of sepsis upon similar treatment in decompensated cirrhosis with sepsis patients at D0, D3 and D7.

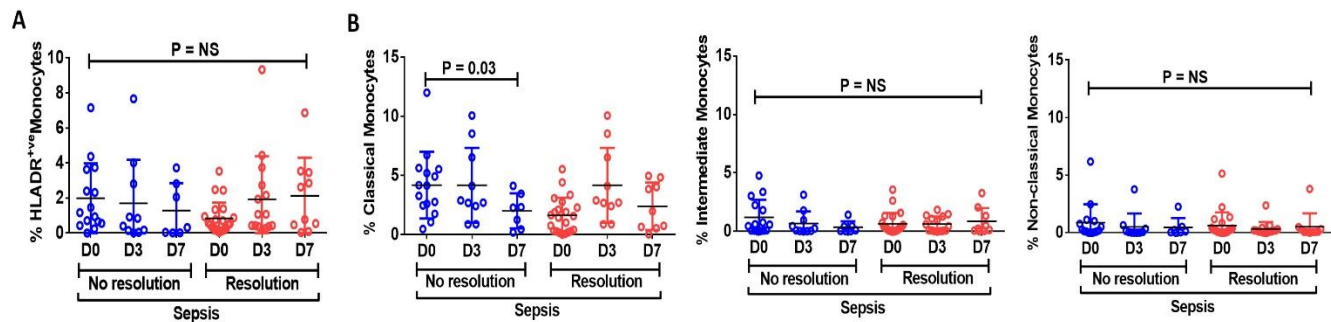

Supplement: s1 [file s1]
